# Supplementary material for: Profiling of the Major Phenolic Compounds and Their Biosynthesis Genes in Sophora flavescens Aiton
Source: Hindawi journal article supplement (doi:10.1155/2018/6218430), 2018-01-01
Supplement: f1 [file 6218430.f1.pdf]

(a)

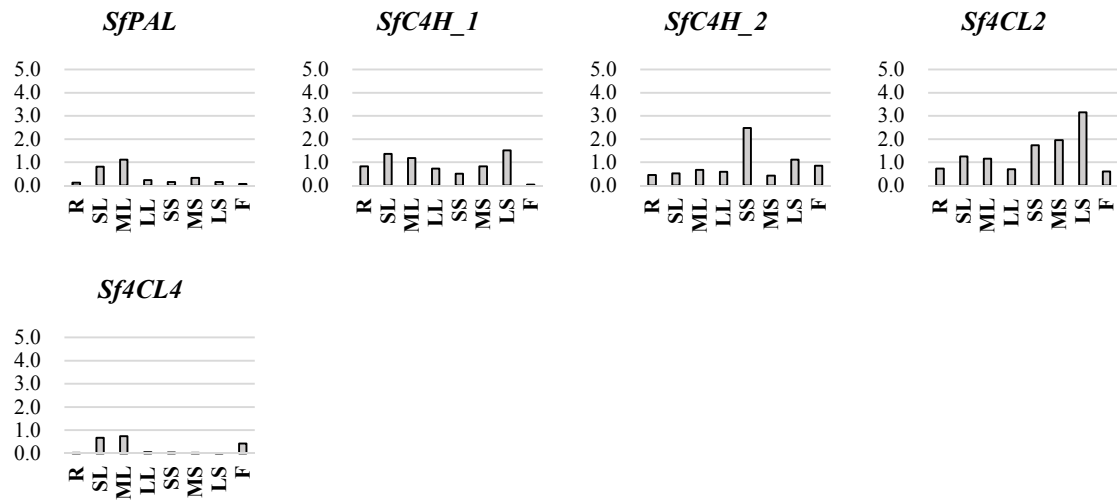

(b)

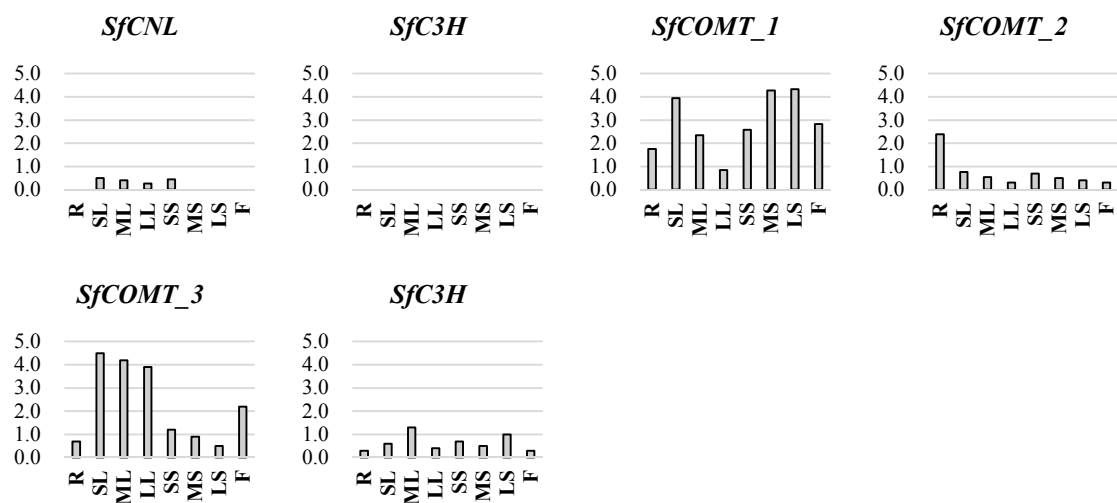

(c)

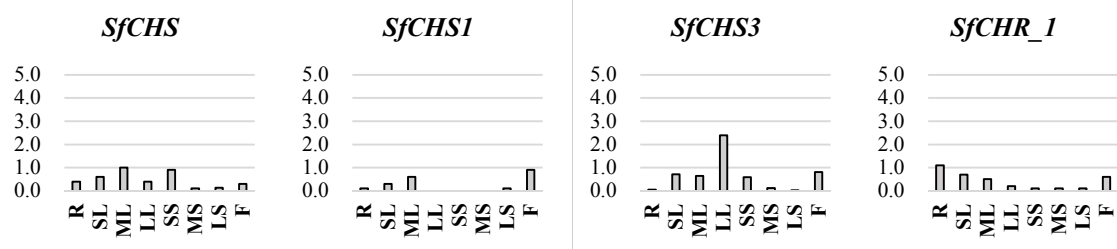

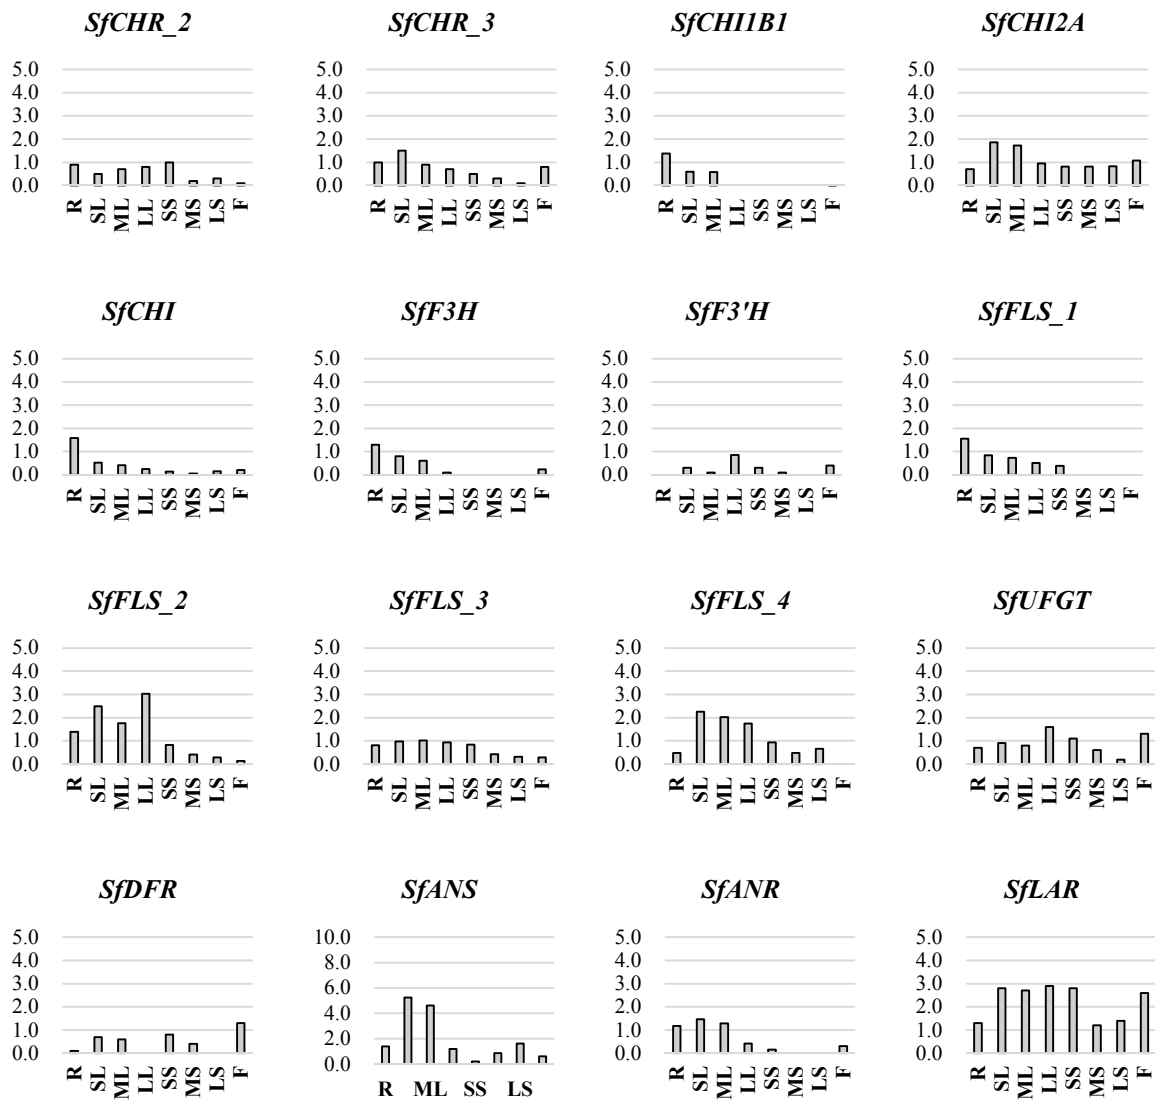

(d)

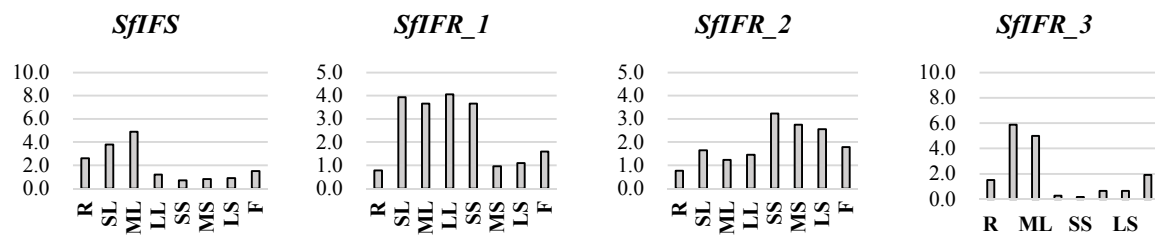

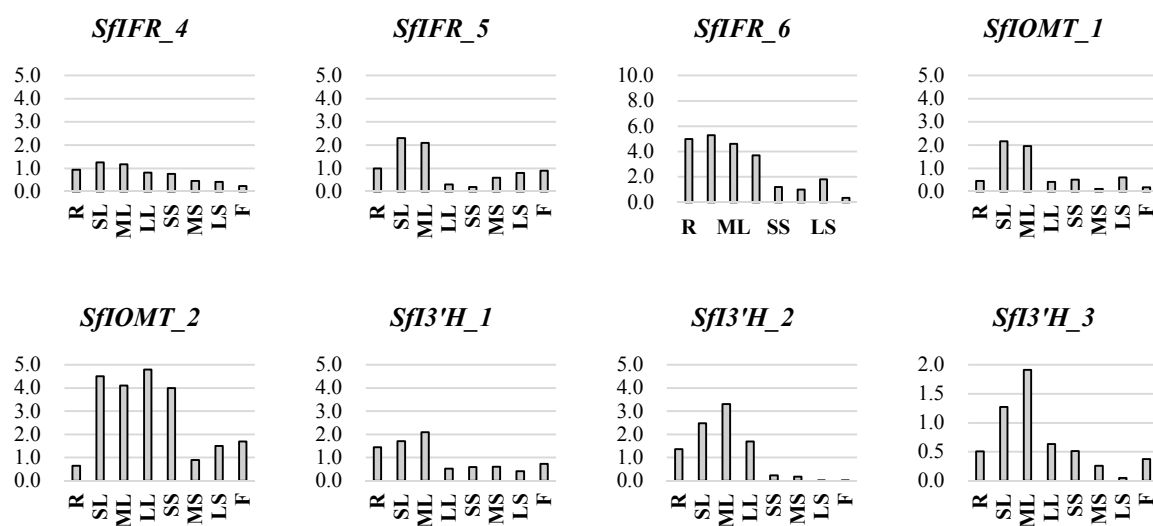

Supplementary Figure 1. Relative level of the flavonoid biosynthesis genes in root, leaves, stems and flower of *Sophorae Radix*. (a) Phenylpropanoid biosynthetic genes. (b) Phenolic acid biosynthetic genes. (c) Flavonoid biosynthetic genes. (d) Isoflavonoid biosynthetic genes. Transcript levels were determined after normalization with *Actin11* as the reference gene. Data are means of relative band intensities of three replicates and standard deviation (SD). R, root; SL, small leaf; ML, medium leaf; LL, large leaf; SS, small stem; MS, medium stem; LS, large stem; F, flower.

Supplementary Table 1 : Flavonoids contents in different organs of Sophorae Radix (µg/g dry weight). R, roots; SL, small leaves; ML, medium leaves; LL, large leaves; SS, small stems; MS, medium stems; LS, large stems; F, flowers.

| Component        |                         | R            | SL         | ML         | LL         | SS          | MS         | LS         | F          |
|------------------|-------------------------|--------------|------------|------------|------------|-------------|------------|------------|------------|
| Phenylpropanoids | <i>t</i> -Cinnamic acid | ND           | ND         | ND         | ND         | 0.62±0.01   | 0.58±0.03  | 0.46±0.01  | ND         |
|                  | <i>p</i> -Coumaric acid | ND           | 8.57±0.43  | 10.28±0.29 | 9.11±0.14  | 4.75±0.14   | 5.47±0.10  | 2.73±0.03  | ND         |
| Phenolic acid    | Benzoic acid            | ND           | ND         | ND         | ND         | 121.83±2.16 | 43.52±3.94 | 64.25±2.58 | 29.12±0.48 |
|                  | Caffeic acid            | 6.62±0.21    | 9.26±1.04  | 12.67±0.44 | 10.44±0.44 | 7.47±0.06   | 10.60±0.40 | 8.75±0.07  | 6.75±0.07  |
|                  | Ferulic acid            | 8.79±0.14    | 6.61±0.05  | 5.95±0.26  | 6.32±0.17  | 7.95±0.13   | 5.72±0.17  | 5.40±0.04  | 7.16±0.14  |
|                  | Chlorogenic acid        | ND           | ND         | ND         | ND         | 115.94±0.46 | 88.58±0.69 | 66.07±0.29 | ND         |
|                  | Kaempferol              | 36.91±7.82   | ND         | ND         | ND         | 2.23±0.03   | 4.67±0.63  | 4.23±0.25  | 3.10±0.44  |
| Flavonoid        | Catechin hydrate        | ND           | ND         | ND         | ND         | 17.56±1.20  | 13.86±2.89 | 17.29±0.57 | ND         |
|                  | Epicatechin             | ND           | 32.16±3.12 | 20.80±0.51 | 80.78±4.34 | 55.66±4.38  | 28.20±1.92 | 30.53±0.85 | ND         |
|                  | Rutin                   | 261.03±10.07 | 352±1.02   | 5.46±0.15  | 6.3±0.08   | ND          | ND         | ND         | 4.8±0.20   |
|                  | Maackiain               | 218.17±22.04 | ND         | ND         | 23.59±5.14 | ND          | ND         | ND         | ND         |

\*ND; not detected

Supplementary Table 2 : Blast search results of flavonoid biosynthetic genes in Sophorae Radix.

| Query       |                             |                       |                        | Subject           |                        |                           |                      |                              |                                 |     |           |
|-------------|-----------------------------|-----------------------|------------------------|-------------------|------------------------|---------------------------|----------------------|------------------------------|---------------------------------|-----|-----------|
|             |                             |                       |                        | Sophorae Radix    | tBLASTN results        |                           |                      |                              |                                 |     |           |
| Gene        | Origin species              | GenBank accession no. | Transcript length (bp) | Transcript ID     | Transcript length (bp) | Identity <sup>a</sup> (%) | Protein coverage (%) | Match length (Protein level) | Mismatch length (Protein level) | Gap | E-value   |
| <b>PAL</b>  | <i>Glycine max</i>          | NM_001250027          | 2,284                  | Sf102447_c0_g1_i1 | 2,644                  | 91.0                      | 98.7                 | 713                          | 58                              | 2   | 0.00E+000 |
| <b>CNL</b>  | <i>Arabidopsis thaliana</i> | NM_105260             | 1,899                  | Sf115103_c0_g2_i1 | 2,219                  | 60.5                      | 96.7                 | 579                          | 200                             | 6   | 0.00E+000 |
| <b>C4H</b>  | <i>Glycine max</i>          | NM_001250388          | 1,531                  | Sf119713_c0_g1_i1 | 4,182                  | 92.1                      | 99.8                 | 506                          | 39                              | 1   | 0.00E+000 |
|             |                             |                       |                        | Sf110063_c0_g1_i1 | 1,945                  | 65.8                      | 92.9                 | 474                          | 155                             | 4   | 0.00E+000 |
| <b>C3H</b>  | <i>Arabidopsis thaliana</i> | NM_180006             | 1,885                  | Sf108373_c0_g1_i1 | 2,131                  | 82.9                      | 96.5                 | 491                          | 84                              | 0   | 0.00E+000 |
| <b>COMT</b> | <i>Glycine max</i>          | XM_003526719          | 1,353                  | Sf126433_c1_g1_i1 | 1,635                  | 91.8                      | 99.7                 | 365                          | 30                              | 0   | 0.00E+000 |
|             | <i>Glycine max</i>          | XM_003554738          | 1,390                  | Sf127741_c0_g1_i3 | 1,387                  | 79.9                      | 94.1                 | 354                          | 66                              | 4   | 0.00E+000 |
|             |                             |                       |                        | Sf127741_c0_g1_i2 | 1,533                  | 76.3                      | 99.7                 | 379                          | 81                              | 6   | 0.00E+000 |
| <b>4CL</b>  | <i>Glycine max</i>          | NM_001249489          | 1,869                  | Sf125371_c0_g2_i1 | 2,167                  | 82.3                      | 98.7                 | 543                          | 92                              | 2   | 0.00E+000 |
|             | <i>Glycine max</i>          | NM_001249307          | 1,697                  | Sf65872_c0_g1_i1  | 2,339                  | 85.1                      | 98.8                 | 564                          | 75                              | 3   | 0.00E+000 |
| <b>CHS</b>  | <i>Glycine max</i>          | NM_001317656          | 1,443                  | Sf115389_c2_g1_i2 | 1,672                  | 93.0                      | 99.5                 | 388                          | 27                              | 0   | 0.00E+000 |
|             | <i>Glycine max</i>          | XM_003533759          | 1,771                  | Sf131019_c3_g1_i1 | 1,412                  | 74.8                      | 99.7                 | 389                          | 97                              | 1   | 0.00E+000 |
|             | <i>Glycine max</i>          | XM_003531172          | 1,473                  | Sf101619_c0_g1_i1 | 1,847                  | 85.0                      | 99.2                 | 387                          | 57                              | 1   | 0.00E+000 |
| <b>CHR</b>  | <i>Glycine max</i>          | NM_001249578          | 1,167                  | Sf110292_c0_g1_i1 | 2,344                  | 84.5                      | 98.4                 | 310                          | 48                              | 0   | 0.00E+000 |
|             |                             |                       |                        | Sf120988_c1_g1_i1 | 1,816                  | 71.0                      | 99.4                 | 314                          | 90                              | 1   | 6.00E-168 |
|             |                             |                       |                        | Sf65645_c0_g2_i1  | 1,497                  | 62.8                      | 99.4                 | 317                          | 113                             | 4   | 1.00E-138 |
| <b>CHI</b>  | <i>Glycine max</i>          | NM_001249826          | 924                    | Sf94496_c0_g1_i1  | 873                    | 84.5                      | 99.6                 | 226                          | 33                              | 1   | 2.00E-133 |
|             | <i>Glycine max</i>          | NM_001249839          | 681                    | Sf113915_c0_g1_i1 | 1,373                  | 77.3                      | 95.1                 | 216                          | 49                              | 0   | 2.00E-112 |
|             | <i>Glycine max</i>          | NM_001248290          | 1,157                  | Sf127219_c1_g1_i1 | 1,383                  | 82.3                      | 98.2                 | 215                          | 38                              | 0   | 3.00E-112 |
| <b>F3H</b>  | <i>Glycine max</i>          | NM_001249868          | 1,405                  | Sf101281_c0_g2_i1 | 1,203                  | 80.5                      | 99.7                 | 375                          | 62                              | 2   | 0.00E+000 |
| <b>F3'H</b> | <i>Glycine max</i>          | NM_001250086          | 1,585                  | Sf113707_c0_g1_i1 | 1,870                  | 83.3                      | 91.6                 | 472                          | 75                              | 3   | 0.00E+000 |
| <b>FLS</b>  | <i>Glycine max</i>          | NM_001250490          | 1,208                  | Sf129219_c0_g1_i2 | 1,167                  | 85.1                      | 99.7                 | 335                          | 49                              | 1   | 0.00E+000 |
|             | <i>Glycine max</i>          | XM_003521781          | 1,401                  | Sf99963_c0_g1_i1  | 1,321                  | 72.0                      | 98.0                 | 343                          | 90                              | 4   | 0.00E+000 |
|             |                             |                       |                        | Sf86503_c1_g1_i1  | 2,318                  | 55.7                      | 94.6                 | 332                          | 136                             | 6   | 2.00E-124 |
|             |                             |                       |                        | Sf112997_c2_g1_i1 | 2,405                  | 55.7                      | 94.6                 | 332                          | 136                             | 6   | 5.00E-124 |

Supplementary Table 2 (continued)

| Query        |                             |                       |                        | Subject           |                        |                           |                      |                              |                                 |     |           |
|--------------|-----------------------------|-----------------------|------------------------|-------------------|------------------------|---------------------------|----------------------|------------------------------|---------------------------------|-----|-----------|
|              |                             |                       |                        | Sophorae Radix    | tBLASTN results        |                           |                      |                              |                                 |     |           |
| Gene         | Origin species              | GenBank accession no. | Transcript length (bp) | Transcript ID     | Transcript length (bp) | Identity <sup>a</sup> (%) | Protein coverage (%) | Match length (Protein level) | Mismatch length (Protein level) | Gap | E-value   |
| <i>UFGT</i>  | <i>Arabidopsis thaliana</i> | AY114654              | 1,372                  | Sf126795_c1_g1_i2 | 2,008                  | 50.6                      | 99.1                 | 484                          | 210                             | 12  | 1.00E-128 |
| <i>DFR</i>   | <i>Glycine max</i>          | NM_001251683          | 1,279                  | Sf69410_c0_g1_i1  | 1,284                  | 83.6                      | 94.8                 | 330                          | 54                              | 0   | 0.00E+000 |
| <i>LAR</i>   | <i>Glycine max</i>          | XM_003556213          | 1,449                  | Sf124159_c0_g3_i6 | 1,412                  | 50.8                      | 82.7                 | 304                          | 180                             | 2   | 1.00E-066 |
| <i>ANS</i>   | <i>Glycine max</i>          | AY382829              | 1,252                  | Sf64126_c0_g1_i1  | 1,244                  | 86.0                      | 99.1                 | 350                          | 49                              | 0   | 0.00E+000 |
| <i>ANR</i>   | <i>Cicer arietinum</i>      | XM_004504890          | 1,300                  | Sf97139_c0_g1_i1  | 1,590                  | 78.6                      | 99.1                 | 336                          | 69                              | 1   | 0.00E+000 |
| <i>IFS</i>   | <i>Glycine max</i>          | NM_001249093          | 1,625                  | Sf107198_c1_g1_i1 | 2,169                  | 82.4                      | 96.4                 | 505                          | 83                              | 2   | 0.00E+000 |
| <i>IFR</i>   | <i>Glycine max</i>          | NM_001250708          | 1,113                  | Sf124159_c0_g3_i6 | 1,412                  | 84.3                      | 89.4                 | 306                          | 48                              | 0   | 0.00E+000 |
|              |                             |                       |                        | Sf85916_c1_g1_i1  | 1,385                  | 79.8                      | 98.1                 | 307                          | 60                              | 1   | 5.00E-176 |
|              |                             |                       |                        | Sf90287_c0_g1_i2  | 1,471                  | 82.5                      | 99.7                 | 308                          | 53                              | 1   | 0.00E+000 |
|              |                             |                       |                        | Sf126666_c0_g1_i2 | 3,119                  | 51.5                      | 98.7                 | 307                          | 146                             | 2   | 1.00E-094 |
|              |                             |                       |                        | Sf119343_c0_g1_i3 | 1,874                  | 73.0                      | 97.5                 | 311                          | 84                              | 0   | 2.00E-168 |
| <i>IOMT</i>  | <i>Glycine max</i>          | XM_003542667          | 1,395                  | Sf97874_c1_g1_i1  | 2,274                  | 83.9                      | 96.4                 | 353                          | 52                              | 2   | 0.00E+000 |
|              |                             |                       |                        | Sf106043_c0_g1_i1 | 2,545                  | 83.9                      | 96.4                 | 353                          | 52                              | 2   | 1.00E-179 |
| <i>I3'H</i>  | <i>Glycine max</i>          | XM_003532623          | 1,652                  | Sf64464_c0_g1_i1  | 2,136                  | 76.2                      | 93.6                 | 470                          | 111                             | 1   | 0.00E+000 |
|              |                             |                       |                        | Sf124770_c0_g1_i1 | 1,997                  | 69.6                      | 91.8                 | 461                          | 139                             | 1   | 0.00E+000 |
|              |                             |                       |                        | Sf119131_c2_g1_i1 | 1,888                  | 65.4                      | 92.2                 | 462                          | 160                             | 0   | 0.00E+000 |
| <i>ACT11</i> | <i>Glycine max</i>          | NM_001252731          | 1,372                  | Sf128341_c1_g1_i1 | 1,799                  | 95.5                      | 99.7                 | 377                          | 17                              | 0   | 0.00E+000 |

<sup>a</sup>Amino acid sequence identity to the query protein

Supplementary Table 3 : Primers used in this study for semi-quantitative RT-PCR of flavonoid biosynthetic genes.

| Gene        | <i>Sophora flavescens</i><br>Transcript ID | Primer  | Primer sequence<br>(5' to 3') | Tm<br>(°C) | Product size<br>(bp) | Designation*    |
|-------------|--------------------------------------------|---------|-------------------------------|------------|----------------------|-----------------|
| <i>PAL</i>  | Sf102447_c0_g1_i1                          | Forward | ATCTCTCAGGTGGCTGCCAT          | 60.0       | 328                  | <i>SfPAL</i>    |
|             |                                            | Reverse | TGCCTGAGTACCCTTGGAGG          | 59.9       |                      |                 |
| <i>CNL</i>  | Sf115103_c0_g2_i1                          | Forward | TTTAAATAATGGTTGGTTTCACACT     | 54.9       | 237                  | <i>SfCNL</i>    |
|             |                                            | Reverse | TTCTTACAATAGCCAATTATTCA       | 53.3       |                      |                 |
| <i>C4H</i>  | Sf119713_c0_g1_i1                          | Forward | GGTCACTCACCCACTCC             | 55.0       | 379                  | <i>SfC4H_1</i>  |
|             |                                            | Reverse | GTGAGGTTGCGGTGGTTG            | 58.0       |                      |                 |
|             | Sf110063_c0_g1_i1                          | Forward | ACCATGCATTAGCTGATG            | 57.0       | 207                  | <i>SfC4H_2</i>  |
|             |                                            | Reverse | AGAGATGGGGAAGTGGCA            | 57.2       |                      |                 |
| <i>C3H</i>  | Sf108373_c0_g1_i1                          | Forward | CATTCTTCACITGGGGCCC           | 60.0       | 319                  | <i>SfC3H</i>    |
|             |                                            | Reverse | CCCACCAACCCCACTAATGC          | 60.0       |                      |                 |
| <i>COMT</i> | Sf126433_c1_g1_i1                          | Forward | ACAAGGGTGTGGTTCACAT           | 58.4       | 264                  | <i>SfCOMT_1</i> |
|             |                                            | Reverse | TATCACATTTCCGGGAAGG           | 54.1       |                      |                 |
|             | Sf127741_c0_g1_i3                          | Forward | CAATTAGGTTTTGTGTCATGGAAG      | 54.5       | 219                  | <i>SfCOMT_2</i> |
|             |                                            | Reverse | CCGTGCTTTCCATGTCGCTG          | 61.3       |                      |                 |
|             | Sf127741_c0_g1_i2                          | Forward | CAAGGTTTTGGTTCATCATG          | 55.0       | 219                  | <i>SfCOMT_3</i> |
|             |                                            | Reverse | CTGTGCTTTCCATGTCACCTT         | 55.3       |                      |                 |
| <i>4CL</i>  | Sf125371_c0_g2_i1                          | Forward | AACAGGGTTGCCAAAAGGGG          | 60.1       | 400                  | <i>Sf4CL2</i>   |
|             |                                            | Reverse | GGGGAATTTGGCCCTGACAG          | 60.0       |                      |                 |
|             | Sf65872_c0_g1_i1                           | Forward | GCGTGCTTCCGTGTTTCAC           | 60.0       | 369                  | <i>Sf4CL4</i>   |
|             |                                            | Reverse | GGAACGGCTGCTTTGCCAAAG         | 60.0       |                      |                 |
| <i>CHS</i>  | Sf115389_c2_g1_i2                          | Forward | TGAGCCTTGCGGATCTCAGA          | 60.0       | 221                  | <i>SfCHS</i>    |
|             |                                            | Reverse | AGCTACCTTCCCATCCACCC          | 60.0       |                      |                 |
|             | Sf131019_c3_g1_i1                          | Forward | AACCCTCGGCATCGAAATGG          | 59.8       | 325                  | <i>SfCHS1</i>   |
|             |                                            | Reverse | TGGTACCTCCACAACACGCA          | 60.1       |                      |                 |
|             | Sf101619_c0_g1_i1                          | Forward | GCCGTGTGGTCTTAAGCTTC          | 60.1       | 272                  | <i>SfCHS3</i>   |
|             |                                            | Reverse | GCTTGTTTCGGCATCCCAAG          | 60.0       |                      |                 |
| <i>CHR</i>  | Sf110292_c0_g1_i1                          | Forward | TACCACCATCCCTCCTGCAG          | 60.0       | 382                  | <i>SfCHR_1</i>  |
|             |                                            | Reverse | GAGTTGGGGCTTGGTTGGTC          | 60.2       |                      |                 |
|             | Sf120988_c1_g1_i1                          | Forward | GCTTTAAGGGTGGTCTGCC           | 60.0       | 333                  | <i>SfCHR_2</i>  |
|             |                                            | Reverse | TTGCTGCCATTTCCGCTCTT          | 59.9       |                      |                 |
|             | Sf65645_c0_g2_i1                           | Forward | ATGGGCCTCTGCAATCTCCT          | 60.0       | 348                  | <i>SfCHR_3</i>  |
|             |                                            | Reverse | CCTGGAACCTGGGAACCTGCC         | 59.9       |                      |                 |
| <i>CHI</i>  | Sf94496_c0_g1_i1                           | Forward | TGACACCTTCTTACGTATT           | 52.7       | 220                  | <i>SfCHI1B1</i> |
|             |                                            | Reverse | CAGGGGTGAGAGGGTTGGAA          | 60.1       |                      |                 |
|             | Sf113915_c0_g1_i1                          | Forward | TCCTCTGGGCAACACTGTGA          | 60.1       | 341                  | <i>SfCHI2A</i>  |
|             |                                            | Reverse | TCAAGTTCACCGCCATTGGG          | 59.9       |                      |                 |
|             | Sf127219_c1_g1_i1                          | Forward | TCTGCAAAATTGTCAATTGGC         | 54.5       | 330                  | <i>SfCHI</i>    |
|             |                                            | Reverse | CCCCTCCAGGATCTCCAAG           | 60.1       |                      |                 |
| <i>F3H</i>  | Sf101281_c0_g2_i1                          | Forward | GTGCCAGGATCAGTGTGTCG          | 60.1       | 345                  | <i>SfF3H</i>    |
|             |                                            | Reverse | GTGGCAAAAAGGCGGTTTC           | 59.9       |                      |                 |
| <i>F3'H</i> | Sf113707_c0_g1_i1                          | Forward | CGACGTTGTAGTGGAAGCTT          | 60.0       | 359                  | <i>SfF3'H</i>   |
|             |                                            | Reverse | CGTCGTTGAACACTCGTCGT          | 60.0       |                      |                 |
| <i>FLS</i>  | Sf129219_c0_g1_i2                          | Forward | GCACAAGAGCTTCAAAACAGG         | 57.3       | 226                  | <i>SfFLS_1</i>  |
|             |                                            | Reverse | ATGCACGAGTTCCCTTCAT           | 56.5       |                      |                 |
|             | Sf99963_c0_g1_i1                           | Forward | ATGGTGGGTTTGAAGGCCAC          | 59.8       | 359                  | <i>SfFLS_2</i>  |
|             |                                            | Reverse | TCGACCTCCATGGCCTTGAT          | 60.0       |                      |                 |
|             | Sf86503_c1_g1_i1                           | Forward | TCAAAGACGGCAAGTGGCTC          | 59.9       | 205                  | <i>SfFLS_3</i>  |
|             |                                            | Reverse | GTGAGTGGTTTTGCAGGGCT          | 60.1       |                      |                 |
|             | Sf112997_c2_g1_i1                          | Forward | AACATCCACGGCCAAACATC          | 60.0       | 261                  | <i>SfFLS_4</i>  |
|             |                                            | Reverse | GTGCCATCATTGGACAGGGG          | 60.1       |                      |                 |
| <i>UFGT</i> | Sf126795_c1_g1_i2                          | Forward | TGCCTCGGATTCCTCACTCT          | 59.9       | 154                  | <i>SfUFGT</i>   |
|             |                                            | Reverse | TTTGCTCTCGCCACATGACC          | 60.0       |                      |                 |
| <i>DFR</i>  | Sf69410_c0_g1_i1                           | Forward | GTCCATGTTGTGCTGTTTGG          | 56.9       | 278                  | <i>SfDFR</i>    |
|             |                                            | Reverse | CCAAGGACCCTGAGAATGAA          | 55.8       |                      |                 |
| <i>LAR</i>  | Sf124159_c0_g3_i6                          | Forward | CCACAGCATGAACCTGTCC           | 60.0       | 286                  | <i>SfLAR</i>    |
|             |                                            | Reverse | CATCCACCTTCTCTCTCGT           | 60.0       |                      |                 |
| <i>ANS</i>  | Sf64126_c0_g1_i1                           | Forward | GAATCTGGGACACATTTTGC          | 54.3       | 202                  | <i>SfANS</i>    |
|             |                                            | Reverse | AGAAGGAAGTTGGGGGTATG          | 55.5       |                      |                 |
| <i>ANR</i>  | Sf97139_c0_g1_i1                           | Forward | TCGACCTGAAGCAGATTCTC          | 56.1       | 315                  | <i>SfANR</i>    |
|             |                                            | Reverse | TTGTACGCTACAAAGCCACA          | 56.8       |                      |                 |
| <i>IFS</i>  | Sf107198_c1_g1_i1                          | Forward | CAAATCAAGGGTCTTGTGTG          | 54.7       | 238                  | <i>SfIFS</i>    |
|             |                                            | Reverse | CAACAGGTAGTGGTGGGTG           | 56.7       |                      |                 |

Supplementary Table 3 (continued)

| Gene         | <i>Sophora flavescens</i><br>Transcript ID | Primer  | Primer sequence<br>(5' to 3') | Tm<br>(°C) | Product size<br>(bp) | Designation*    |
|--------------|--------------------------------------------|---------|-------------------------------|------------|----------------------|-----------------|
| <i>IFR</i>   | Sf124159_c0_g3_i6                          | Forward | CCACAGCATGAACCCTGTCC          | 60.0       | 284                  | <i>SfIFR_1</i>  |
|              |                                            | Reverse | CATCCACCTTCCTCCTCGT           | 60.0       |                      |                 |
|              | Sf85916_c1_g1_i1                           | Forward | CTGGGCTAATGTGGGAGGA           | 60.0       | 235                  | <i>SfIFR_2</i>  |
|              |                                            | Reverse | GCAACTTGCCGATCAGGTCA          | 60.0       |                      |                 |
|              | Sf90287_c0_g1_i2                           | Forward | GAGGTTCTGTGGCTTCTGGC          | 60.0       | 236                  | <i>SfIFR_3</i>  |
|              |                                            | Reverse | GAAGCTCGTTGAAGCGGTCA          | 60.0       |                      |                 |
| <i>IOMT</i>  | Sf126666_c0_g1_i2                          | Forward | GGGGCAACAGGAAATCTGGG          | 60.0       | 188                  | <i>SfIFR_4</i>  |
|              |                                            | Reverse | AGCCTCAACAATGCTGGCTT          | 59.6       |                      |                 |
|              | Sf119343_c0_g1_i3                          | Forward | GAGGAGGATTTGGTGGCTGC          | 60.1       | 348                  | <i>SfIFR_6</i>  |
|              |                                            | Reverse | AGGGCCAAGGACACACATCT          | 60.1       |                      |                 |
|              | Sf97874_c1_g1_i1                           | Forward | GCCGCCTTTGTTTATTCTCT          | 55.5       | 326                  | <i>SfIOMT_1</i> |
|              |                                            | Reverse | CCATGGAGCTAACGAAGTTG          | 55.6       |                      |                 |
| <i>I3'H</i>  | Sf106043_c0_g1_i1                          | Forward | CCGCACAAAATAACAACCAT          | 54.2       | 265                  | <i>SfIOMT_2</i> |
|              |                                            | Reverse | ATTTCACTTCAGAGCCGTTG          | 54.4       |                      |                 |
|              | Sf64464_c0_g1_i1                           | Forward | CTGTGCCAGCTTCTGCATCA          | 60.0       | 284                  | <i>SfI3'H_1</i> |
|              |                                            | Reverse | ATTCCTCTGGTTCGGCTCA           | 59.9       |                      |                 |
|              | Sf124770_c0_g1_i1                          | Forward | TGTGCTTCCCACTTCGATGC          | 60.0       | 296                  | <i>SfI3'H_2</i> |
|              |                                            | Reverse | GGTGCAAGTTAGGTCGAGGC          | 60.1       |                      |                 |
| <i>ACT11</i> | Sf119131_c2_g1_i1                          | Forward | GATATGCTTGCCGCGAGAA           | 59.9       | 227                  | <i>SfI3'H_3</i> |
|              |                                            | Reverse | CACCAGGTCCACCCTCTCTT          | 59.8       |                      |                 |
|              | Sf128341_c1_g1_i1                          | Forward | TTGGTCGACCTCGCCATACT          | 60.0       | 321                  | <i>SfACT11</i>  |
|              |                                            | Reverse | GGGAGAGGACAGCCTGGATT          | 60.0       |                      |                 |

\*Transcript variants are designated according to the name of the query genes and the designations are used in Figure 2. The order of the transcripts followed the sequence of flavonoid biosynthetic pathway.
